# Supplementary material
Source: PubMed Central journal article supplement (PMC3131948)
Supplement: cdd2010190x1.pdf [file cdd2010190x1.pdf]

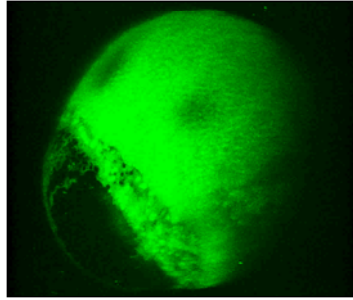

tctg cgaccgatgt gaaggatttt ctggtgcgtc tgtgcgaccg tgaaccatgc ctcgctcgtt  
sct2<sup>MO2</sup> sct2<sup>MO1</sup>

**Figure S3. Sequences of morpholino oligonucleotides and distribution of the injected fluoresceinated MO1 in the developing zebrafish embryo.** Fluoresceinated MO1 was injected at the one cell stage. Note its distribution throughout the embryo at 75% epiboly.

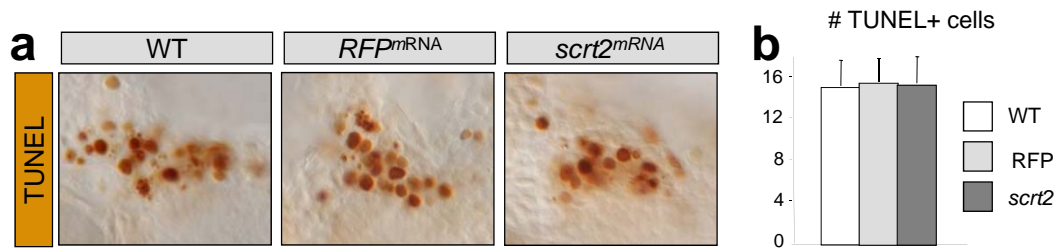

**Figure S4. *scratch2* overexpression does not protect from endogenous cell death.** (a) Normal embryos (WT) or injected with an irrelevant mRNA (red fluorescent protein, RFP) or with *scratch2* mRNA. 24hpf embryos were subjected to TUNEL staining, flat-mounted and photographed at the level of the trigeminal ganglion. Anterior is to the left. (b) Quantification of TUNEL-positive trigeminal cells of the corresponding embryos. 8 different trigeminal ganglia were counted per condition. No statistical significance in t-test was found in the number of apoptotic cells between *scrt2* overexpression and the control conditions.
